# Supplementary material for: Transition metal atom M (M = Fe, Co, Cu, Cr) doping and oxygen vacancy modulated M–Ni5P4–NiMOH nanosheets as multifunctional electrocatalysts for efficient overall water splitting and urea electrolysis reaction
Source: Royal Society of Chemistry journal article supplement (doi:10.1039/d2dt02673b), 2022-01-01
Supplement: d2dt02673b1.pdf [file d2dt02673b1.pdf]

## **Transition metal atoms M (M = Fe, Co, Cu, Cr) doping and oxygen vacancy modulated M-Ni<sub>5</sub>P<sub>4</sub>-NiMOH nanosheets as multifunctional electrocatalysts for efficient overall water splitting and urea electrolysis reaction**

Yanhong Wang<sup>a</sup>, Chenyi Zhang<sup>a</sup>, Xiaoqiang Du<sup>a\*</sup> and Xiaoshuang Zhang<sup>b</sup>

<sup>a</sup> School of Chemical Engineering and Technology, North University of China, Taiyuan 030051, People's Republic of China. E-mail: duxq16@nuc.edu.cn

<sup>b</sup> School of Science, North University of China, Taiyuan 030051, People's Republic of China.

**DFT computation details:** The DFT calculations were performed using the Cambridge Sequential Total Energy Package (CASTEP) with the plane-wave pseudo-potential method. The geometrical structures of the (003) plane of Co-NiOOH, Cr-NiOOH, Cu-NiOOH and Fe-NiOOH was optimized by the generalized gradient approximation (GGA) methods. The Revised Perdew-Burke-Ernzerh of (RPBE) functional was used to treat the electron exchange correlation interactions. A Monkhorst Pack grid k-points of 7\*7\*1 of Co-NiOOH, Cr-NiOOH, Cu-NiOOH and Fe-NiOOH, a plane-wave basis set cut-off energy of 500 eV were used for integration of the Brillouin zone. The structures were optimized for energy and force convergence set at 0.05 eV/Å and  $2.0 \times 10^{-5}$  eV, respectively.

### **Experiment section**

#### **Chemicals and materials**

All reagents were analytical grade and were used directly without any purification. Ni(NO<sub>3</sub>)<sub>2</sub>·6H<sub>2</sub>O, NaH<sub>2</sub>PO<sub>2</sub>·H<sub>2</sub>O, Fe(NO<sub>3</sub>)<sub>3</sub>·9H<sub>2</sub>O, Co(NO<sub>3</sub>)<sub>3</sub>·6H<sub>2</sub>O, Cu(NO<sub>3</sub>)<sub>2</sub>·6H<sub>2</sub>O, Cr(NO<sub>3</sub>)<sub>3</sub>·9H<sub>2</sub>O, urea (CH<sub>4</sub>N<sub>2</sub>O), and ammonium fluoride (NH<sub>4</sub>F) were purchased from Sigma-Aldrich. Commercial nickel foam (NF) was purchased from an energy company. Deionized water was used in all experiments.

#### **Synthesis of precursor Co-doped Ni(OH)<sub>2</sub>/NF**

The Co-doped Ni(OH)<sub>2</sub>/NF nanosheets were prepared by hydrothermal method. Firstly, the commercial NF (2.8 cm × 3 cm × 1 mm) was successively washed in acetone and dilute HCl

solution ( $V_{\text{H}_2\text{O}} : V_{\text{HCl}} = 1 : 2$ ) under ultrasonication for 30 and 20 min, respectively, and followed by with water. Secondly, 0.75 mmol  $\text{Ni}(\text{NO}_3)_2 \cdot 6\text{H}_2\text{O}$ , 0.25 mmol  $\text{Co}(\text{NO}_3)_3 \cdot 6\text{H}_2\text{O}$ , 3 mmol  $\text{CH}_4\text{N}_2\text{O}$ , and 3 mmol  $\text{NH}_4\text{F}$  were dissolved in 30 mL deionized water. Thirdly, the NF and the mixed solutions were transferred to a 45 mL stainless-steel Teflon-lined autoclave heated at 140 °C for 4 h. After natural cooling to room temperature, the resultant NiCo-LDH/NF were washed thoroughly with deionized water and dried in vacuum at 60 °C for 12 h. Finally, the obtained NiCo-LDH/NF was calcinated in air at 300 °C for 30 min to form Co-doped  $\text{Ni}(\text{OH})_2/\text{NF}$  (denoted as NiCoOH/NF).

### **Synthesis of Co-Ni<sub>5</sub>P<sub>4</sub>/ Co-Ni(OH)<sub>2</sub>/NF**

The obtained NiCoOH/NF was loaded in a quartz boat, and the  $\text{NaH}_2\text{PO}_2 \cdot \text{H}_2\text{O}$  (1 g) was placed in another quartz boat. The two quartz boats were packaged by the silver papers with three small holes. Afterwards, the boats were put into a tube furnace. The furnace was purged with nitrogen ( $\text{N}_2$ ) at a flow rate of 20 sccm for 1 h and then was heated at 350 °C for 2 h. The  $\text{N}_2$  gas flow was maintained throughout the whole process. Finally, the NiMOH/NF were transformed to Co-Ni<sub>5</sub>P<sub>4</sub>/ Co-Ni(OH)<sub>2</sub>/NF (Co-Ni<sub>5</sub>P<sub>4</sub>-NiCoOH/NF).

### **Synthesis of M-Ni<sub>5</sub>P<sub>4</sub>-NiMOH (M = Fe, Cu, Cr)**

The preparation process was same as that of Co-Ni<sub>5</sub>P<sub>4</sub>-NiCoOH/NF. During the experiment,  $\text{Co}(\text{NO}_3)_3 \cdot 6\text{H}_2\text{O}$  was replaced with  $\text{Fe}(\text{NO}_3)_3 \cdot 9\text{H}_2\text{O}$ ,  $\text{Cu}(\text{NO}_3)_2 \cdot 6\text{H}_2\text{O}$ ,  $\text{Cr}(\text{NO}_3)_3 \cdot 9\text{H}_2\text{O}$ .

### **Materials Characterization**

The XRD patterns were reported from a Philips 1130 X-ray diffractometer (40 kV, 30 mA, Cu KR radiation,  $\lambda=1.5418 \text{ \AA}$ ). The morphology of the Co-Ni<sub>5</sub>P<sub>4</sub>-NiCoOH/NF, Fe-Ni<sub>5</sub>P<sub>4</sub>-NiFeOH/NF, Cu-Ni<sub>5</sub>P<sub>4</sub>-NiCuOH/NF and Cr-Ni<sub>5</sub>P<sub>4</sub>-NiCrOH/NF material is characterized by SEM images (Hitachi S-4800). TEM and HRTEM images were performed on a JEM-2100 with an accelerating voltage of 200 kV. The chemical composition and elemental states were analyzed by X-ray photoelectron spectroscopy (XPS, Axis Ultra DLD) using 60 W monochromated Mg K $\alpha$  radiations as the exciting source.

## Electrochemical measurements

Electrocatalytic tests were done with a CHI 760E electrochemical workstation (CH Instruments, Inc., Shanghai) in a typical three-electrode device. The resulting self-supported Co-Ni<sub>5</sub>P<sub>4</sub>-NiCoOH/NF, Fe-Ni<sub>5</sub>P<sub>4</sub>-NiFeOH/NF, Cu-Ni<sub>5</sub>P<sub>4</sub>-NiCuOH/NF and Cr-Ni<sub>5</sub>P<sub>4</sub>-NiCrOH/NF electrodes were directly utilized as working electrode, a graphite rod and Ag/AgCl as counter electrode and reference electrode, respectively. All measured potentials in this work were calibrated to RHE according to the following equation:  $E(\text{RHE}) = E(\text{Ag/AgCl}) + (0.197 + 0.059 \cdot \text{pH})$ . Linear sweep voltammetry polarization curves were performed in 1 M KOH solution at a scan rate of 5 mV s<sup>-1</sup>. Electrochemical impedance spectra (EIS) were collected at a frequency between 100 kHz and 0.01 Hz. In water splitting tests, all results were revised by ohmic potentials drop (iR) correction. The electrolyte for OER measurements was 1 M KOH, whereas the UOR performances were evaluated in 1 M KOH with 0.5 M urea. The stability measurements were recorded by chronopotentiometry measurements.

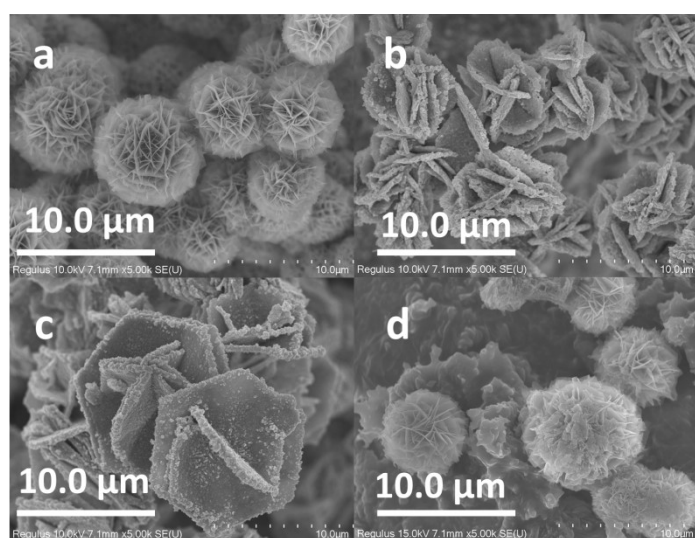

**Fig. S1.** SEM images of (a) Fe-Ni<sub>5</sub>P<sub>4</sub>-NiFeOH, (b) Co-Ni<sub>5</sub>P<sub>4</sub>-NiCoOH, (c) Cu-Ni<sub>5</sub>P<sub>4</sub>-NiCuOH and (d) Cr-Ni<sub>5</sub>P<sub>4</sub>-NiCrOH.

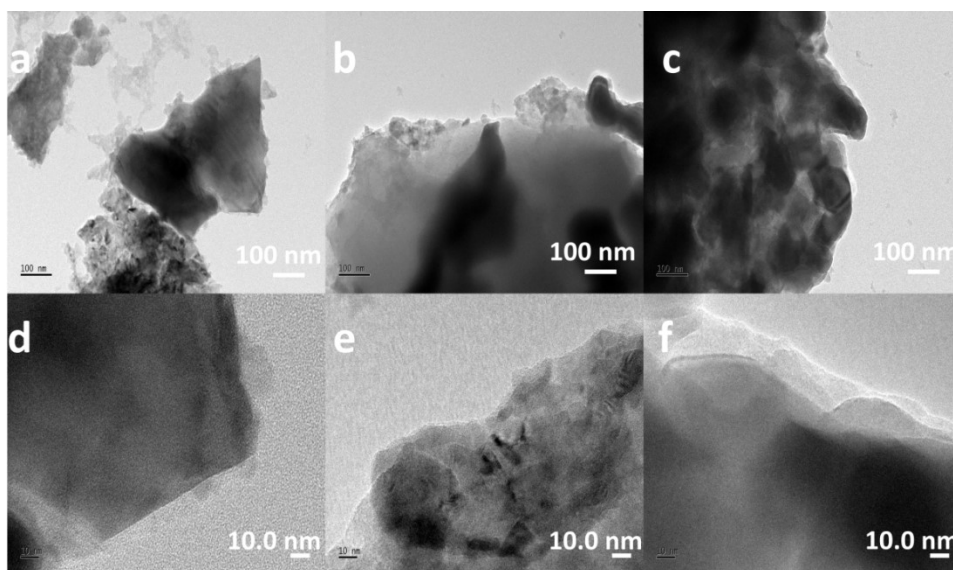

**Fig. S2.** TEM images of Co-Ni<sub>5</sub>P<sub>4</sub>-NiCoOH (a-c) 100 nm, and (d-f) 10 nm.

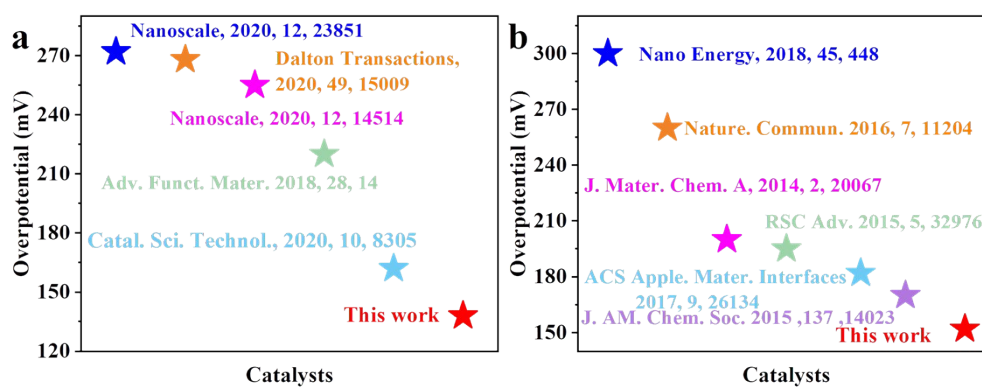

**Fig. S3.** Comparison of overpotentials of (a) OER [1-5] and (b) HER [6-11] for Co-Ni<sub>5</sub>P<sub>4</sub>-NiCoOH electrodes with reported electrocatalysts in the alkaline media.

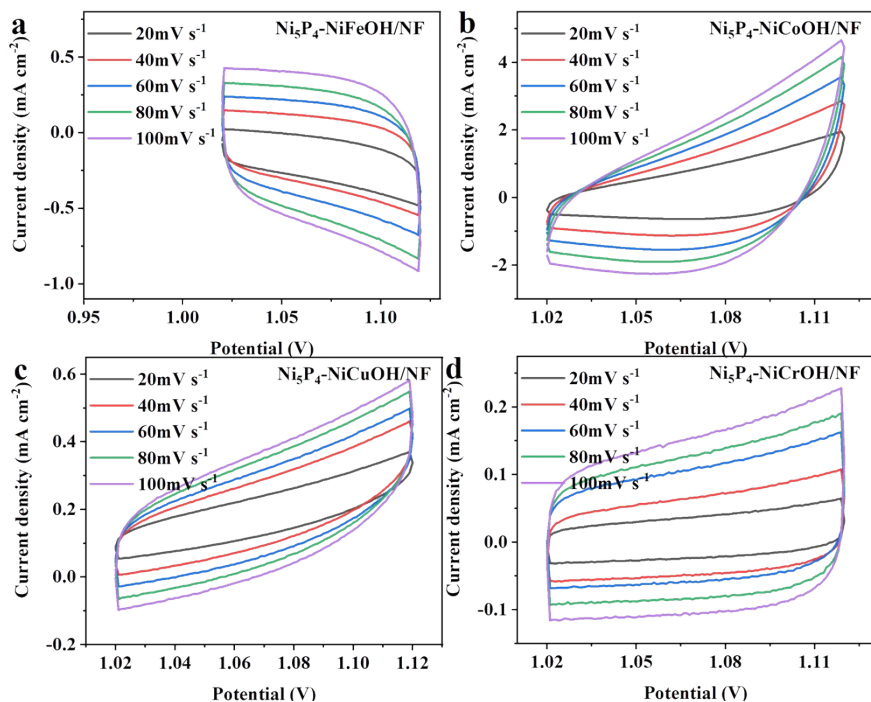

**Fig. S4.** In 1.0 M KOH, cyclic voltammograms of a) Fe-Ni<sub>5</sub>P<sub>4</sub>-NiFeOH, b) Co-Ni<sub>5</sub>P<sub>4</sub>-NiCoOH, c) Cu-Ni<sub>5</sub>P<sub>4</sub>-NiCuOH and d) Cr-Ni<sub>5</sub>P<sub>4</sub>-NiCrOH at the different scan rates varying from 20 to 100 mV·s<sup>-1</sup> for OER.

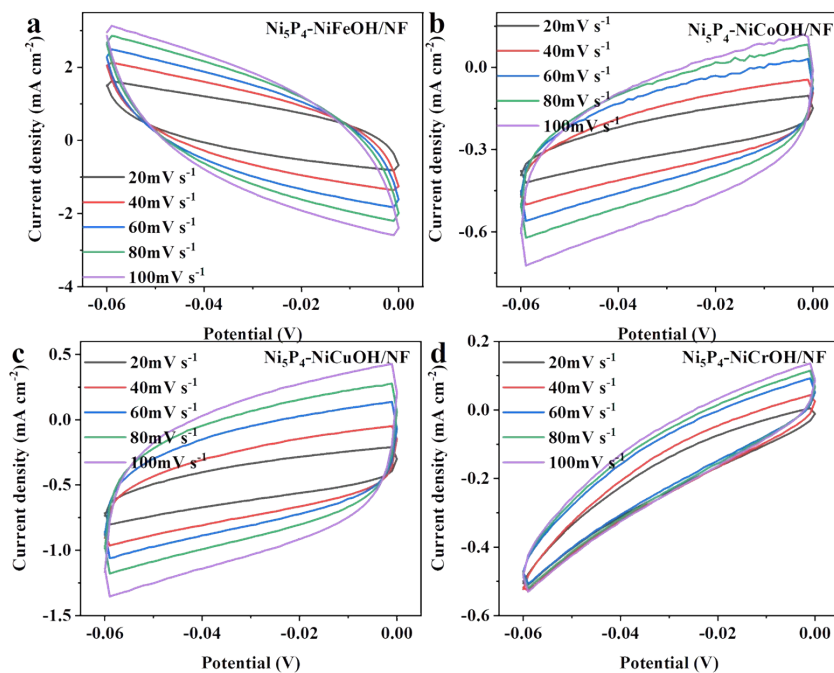

**Fig. S5.** In 1.0 M KOH, cyclic voltammograms of a) Fe-Ni<sub>5</sub>P<sub>4</sub>-NiFeOH, b) Co-Ni<sub>5</sub>P<sub>4</sub>-NiCoOH, c) Cu-Ni<sub>5</sub>P<sub>4</sub>-NiCuOH and d) Cr-Ni<sub>5</sub>P<sub>4</sub>-NiCrOH at the different scan rates varying from 20 to 100 mV·s<sup>-1</sup> for HER.

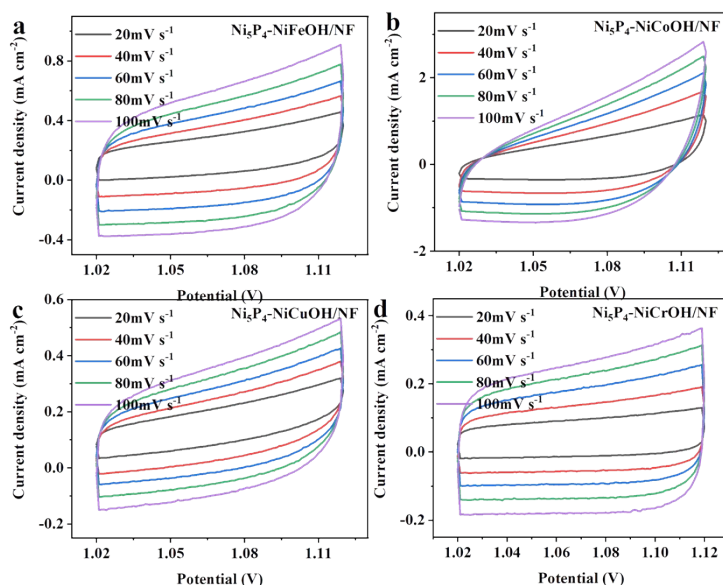

**Fig. S6.** In 1.0 M KOH with 0.5 M urea, cyclic voltammograms of a) Fe-Ni<sub>5</sub>P<sub>4</sub>-NiFeOH, b) Co-Ni<sub>5</sub>P<sub>4</sub>-NiCoOH, c) Cu-Ni<sub>5</sub>P<sub>4</sub>-NiCuOH and d) Cr-Ni<sub>5</sub>P<sub>4</sub>-NiCrOH at the different scan rates varying from 20 to 100 mV·s<sup>-1</sup> for UOR.

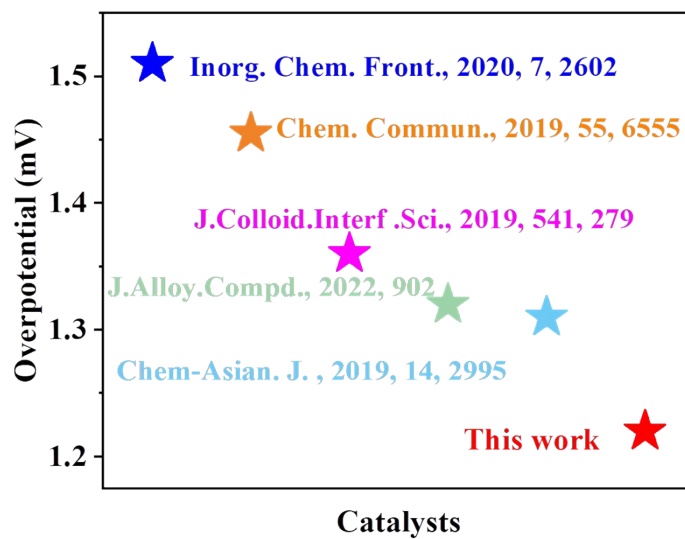

**Fig. S7.** Comparison of overpotentials of UOR [12-16] in 1M KOH + 0.5 M Urea.

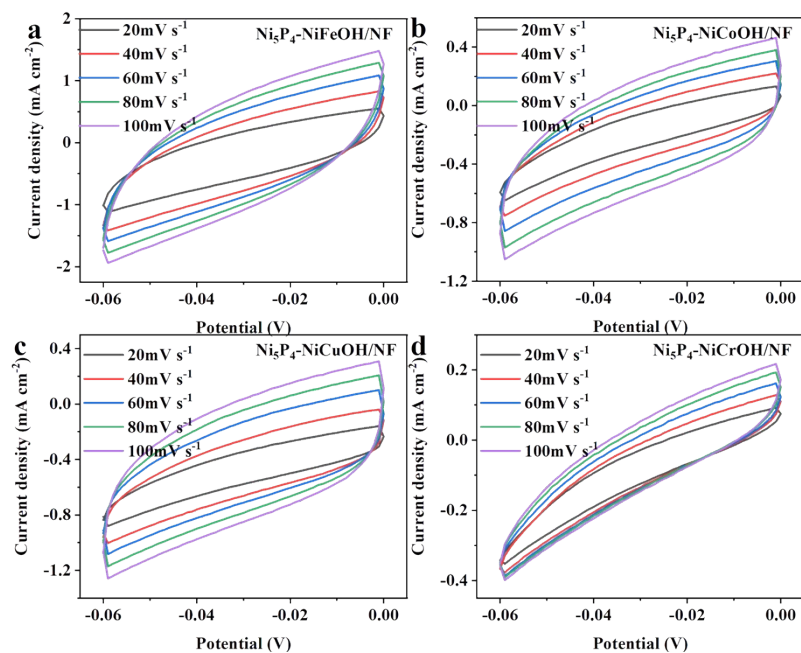

**Fig. S8.** In 1.0 M KOH with 0.5 M urea, cyclic voltammograms of a) Fe-Ni<sub>5</sub>P<sub>4</sub>-NiFeOH, b) Co-Ni<sub>5</sub>P<sub>4</sub>-NiCoOH, c) Cu-Ni<sub>5</sub>P<sub>4</sub>-NiCuOH and d) Cr-Ni<sub>5</sub>P<sub>4</sub>-NiCrOH at the different scan rates varying from 20 to 100 mV·s<sup>-1</sup> for HER.

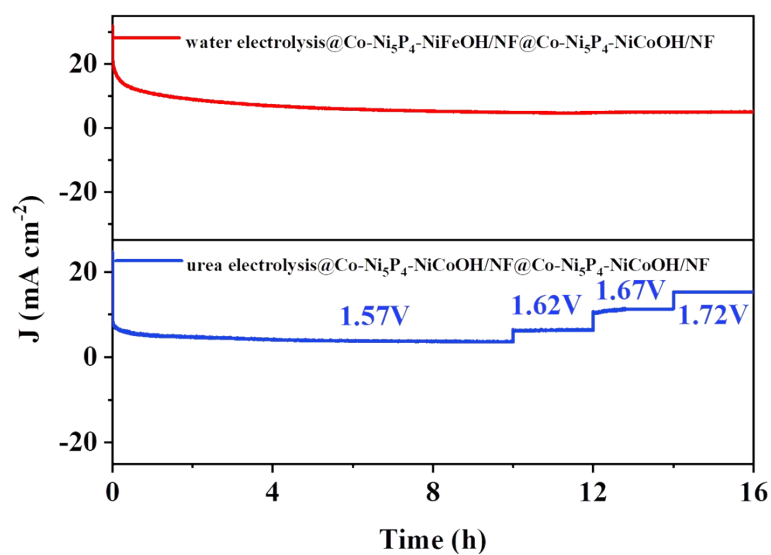

**Fig. S9.** Chronopotentiometric curve of Co-Ni<sub>5</sub>P<sub>4</sub>-NiCoOH for water electrolysis (1M KOH) and urea electrolysis (1M KOH + 0.5M Urea).

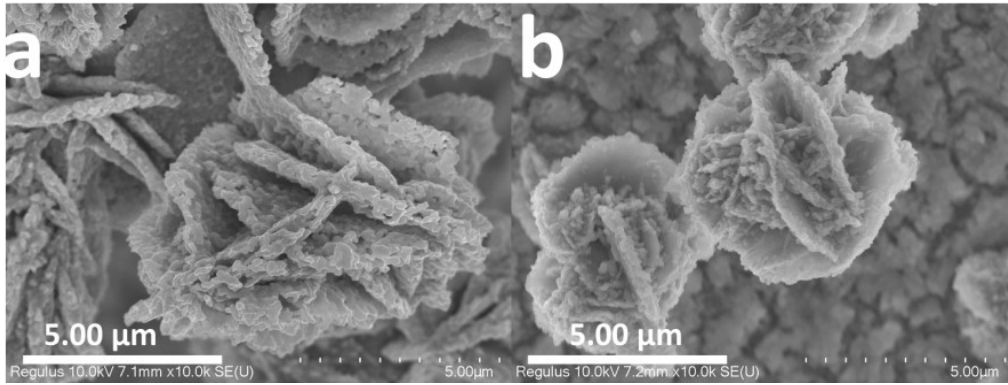

**Fig. S10.** SEM images of a) Co-Ni<sub>5</sub>P<sub>4</sub>-NiCoOH and b) Co-Ni<sub>3</sub>P<sub>4</sub>-NiCoOH after OER for 16 h.

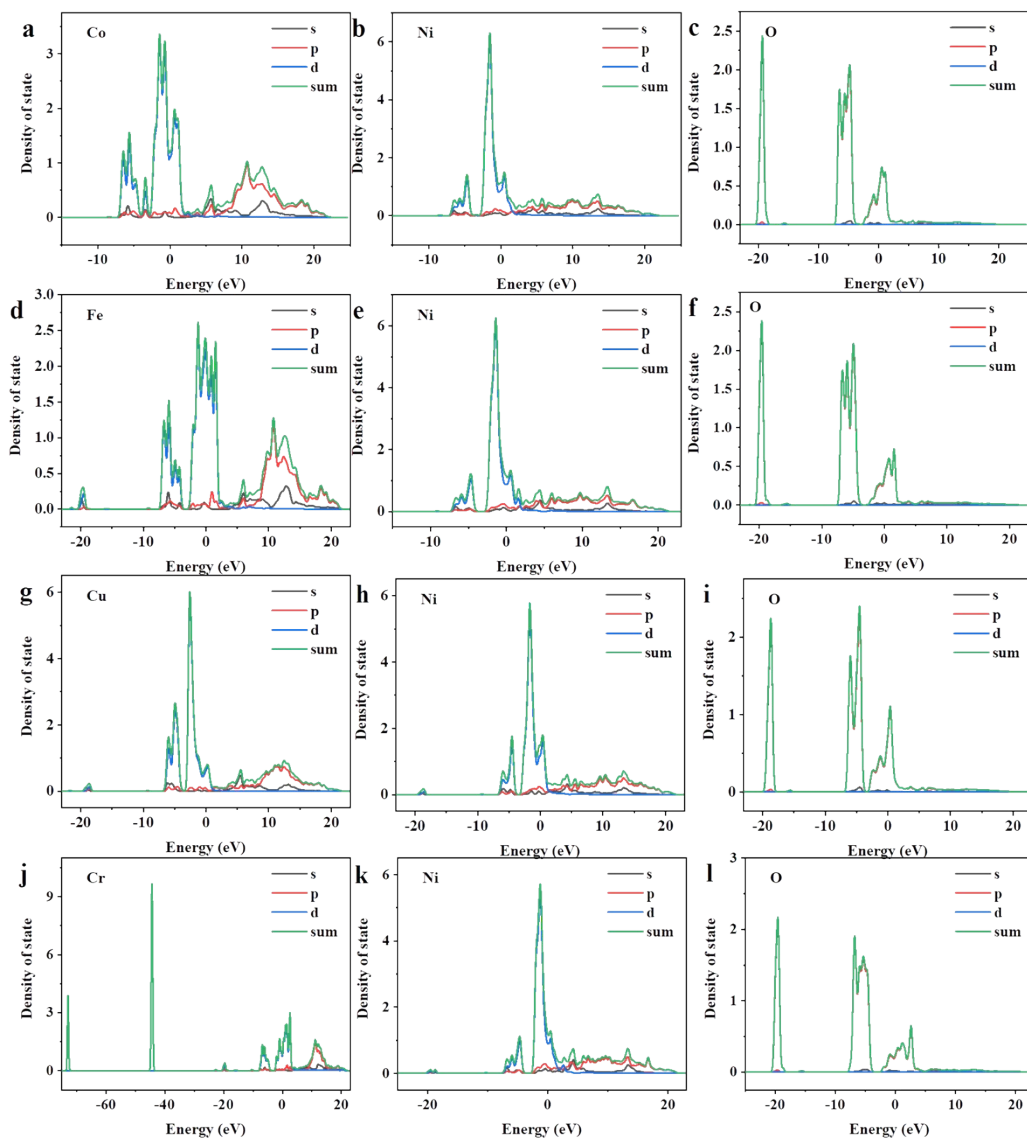

**Fig.S11.** Density of states for the Co-NiOOH, (a) Co, (b) Ni and (c) O; the Fe-NiOOH ,(d) Fe, (e) Ni and (f) O; the Cu-NiOOH, (g) Cu, (h) Ni and (i) O and the Cr-NiOOH ,(f) Cr, (g)Ni and (h) O.



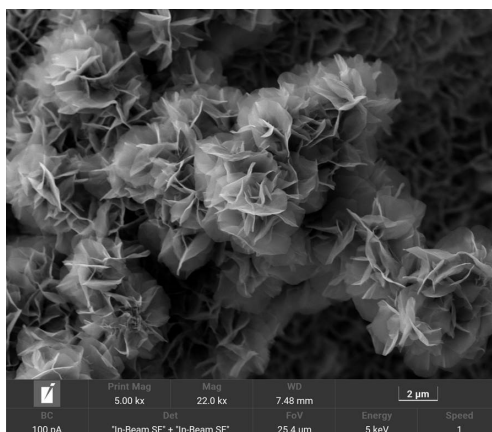

**Fig. S12.** SEM images of Co doped Ni(OH)<sub>2</sub>/NF.

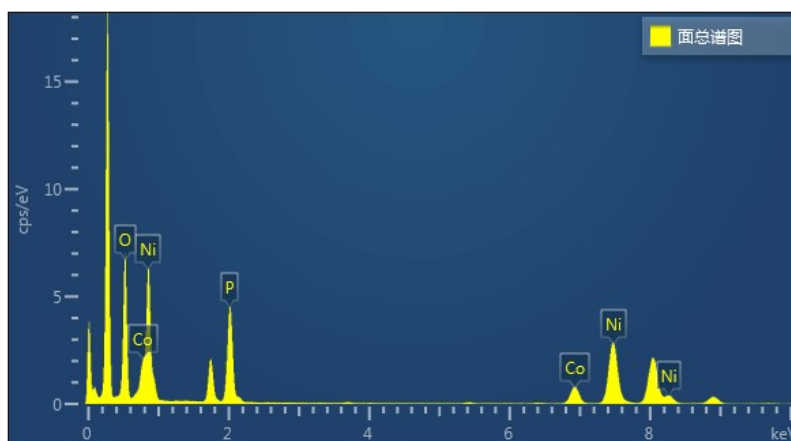

**Table S1.** Elemental composition of Co, Ni and P in the Co-Ni<sub>5</sub>P<sub>4</sub>-NiCoOH nanoarrays and by ICP. Regardless of oxygen by this characterization.

| Element | Mass fraction % | Atomic fraction % |
|---------|-----------------|-------------------|
| Co      | 10.18           | 5.36              |
| Ni      | 31.68           | 15.19             |
| P       | 40.17           | 10.23             |

- [1] H.J. Zhang, X.P. Li, A. Hahnel, V. Naumann, C. Lin, S. Azimi, S.L. Schweizer, A.W. Maijenburg, R.B. Wehrspohn, Bifunctional Heterostructure Assembly of NiFe LDH Nanosheets on NiCoP Nanowires for Highly Efficient and Stable Overall Water Splitting; *Adv. Funct. Mater.*, 2018;28.
- [2] J.M. Huo, Y. Wang, L.T. Yan, Y.Y. Xue, S.N. Li, M.C. Hu, Y.C. Jiang, Q.G. Zhai, In situ semi-transformation from heterometallic MOFs to Fe-Ni LDH/MOF hierarchical architectures for boosted oxygen evolution reaction; *Nanoscale*, 2020;12: 14514-23.
- [3] F.F. Yuan, Z.H. Liu, G.X. Qin, Y.H. Ni, Fe-Doped Co-Mo-S microtube: a highly efficient bifunctional electrocatalyst for overall water splitting in alkaline solution; *Dalton Transactions*, 2020;49: 15009-22.
- [4] R. Zhang, R.L. Zhu, Y. Li, Z. Hui, Y.Y. Song, Y.L. Cheng, J.J. Lu, CoP and Ni<sub>2</sub>P implanted in a hollow porous N-doped carbon polyhedron for pH universal hydrogen evolution reaction and alkaline overall water splitting; *Nanoscale*, 2020;12: 23851-8.
- [5] H. Zhao, M. Jiang, Q. Kang, L.Q. Liu, N. Zhang, P.C. Wang, F.M. Zhou, Electrocatalytic oxygen and hydrogen evolution reactions at Ni<sub>3</sub>B/Fe<sub>2</sub>O<sub>3</sub> nanotube arrays under visible light radiation; *Catal. Sci. Technol.*, 2020;10: 8305-13.
- [6] J. Wang, D.F. Gao, G.X. Wang, S. Miao, H.H. Wu, J.Y. Li, X.H. Bao, Cobalt nanoparticles encapsulated in nitrogen-doped carbon as a bifunctional catalyst for water electrolysis; *J. Mater. Chem. A*, 2014;2: 20067-74.
- [7] L.L. Feng, G.T. Yu, Y.Y. Wu, G.D. Li, H. Li, Y.H. Sun, T. Asefa, W. Chen, X.X. Zou, High-Index Faceted Ni<sub>3</sub>S<sub>2</sub> Nanosheet Arrays as Highly Active and Ultrastable Electrocatalysts for Water Splitting; *J. Am. Chem. Soc.*, 2015;137: 14023-6.
- [8] X.L. Wu, B. Yang, Z.J. Li, L.C. Lei, X.W. Zhang, Synthesis of supported vertical NiS<sub>2</sub> nanosheets for hydrogen evolution reaction in acidic and alkaline solution; *Rsc Advances*, 2015;5: 32976-82.
- [9] J.S. Li, Y. Wang, C.H. Liu, S.L. Li, Y.G. Wang, L.Z. Dong, Z.H. Dai, Y.F. Li, Y.Q. Lan, Coupled molybdenum carbide and reduced graphene oxide electrocatalysts for efficient hydrogen evolution; *Nat. Commun.*, 2016;7.
- [10] C.J. Xuan, J. Wang, W.W. Xia, Z.K. Peng, Z.X. Wu, W. Lei, K.D. Xia, H.L.L. Xin, D.L. Wang, Porous Structured Ni-Fe-P Nanocubes Derived from a Prussian Blue Analogue as an Electrocatalyst for Efficient Overall Water Splitting; *ACS Appl. Mater. Interfaces* . 2017;9: 26134-42.
- [11] Y. Zhang, Q. Shao, S. Long, X.Q. Huang, Cobalt-molybdenum nanosheet arrays as highly efficient and stable earth-abundant electrocatalysts for overall water splitting; *Nano Energy*, 2018;45: 448-55.

- [12] F.C. Wu, G. Ou, J. Yang, H.N. Li, Y.X. Gao, F.M. Chen, Y. Wang, Y.M. Shi, Bifunctional nickel oxide-based nanosheets for highly efficient overall urea splitting; *Chem. Commun.*, 2019;55: 6555-8.
- [13] L. Yan, Y.L. Sun, E.L. Hu, J.Q. Ning, Y.J. Zhong, Z.Y. Zhang, Y. Hu, Facile in-situ growth of Ni<sub>2</sub>P/Fe<sub>2</sub>P nanohybrids on Ni foam for highly efficient urea electrolysis; *J. Colloid. Interf. Sci.*, 2019;541: 279-86.
- [14] C.Y. Zhang, T.T. Chen, H. Zhang, Z.H. Li, J.C. Hao, Hydrated-Metal-Halide-Based Deep-Eutectic-Solvent-Mediated NiFe Layered Double Hydroxide: An Excellent Electrocatalyst for Urea Electrolysis and Water Splitting; *Chemistry-an Asian Journal*, 2019;14: 2995-3002.
- [15] H.Z. Xu, K. Ye, K. Zhu, J.L. Yin, J. Yan, G.L. Wang, D.X. Cao, Template-directed assembly of urchin-like CoS<sub>x</sub>/Co-MOF as an efficient bifunctional electrocatalyst for overall water and urea electrolysis; *Inorganic Chemistry Frontiers*, 2020;7: 2602-10.
- [16] Q. Li, W.X. Zhang, J. Shen, X.Y. Zhang, Z. Liu, J.Q. Liu, Trimetallic nanoplate arrays of Ni-Fe-Mo sulfide on FeNi<sub>3</sub> foam: A highly efficient and bifunctional electrocatalyst for overall water splitting; *J. Alloy. Compd.*, 2022;902.
